# Supplementary material
Source: PubMed Central journal article supplement (PMC6493331)

Figure S1

(a)

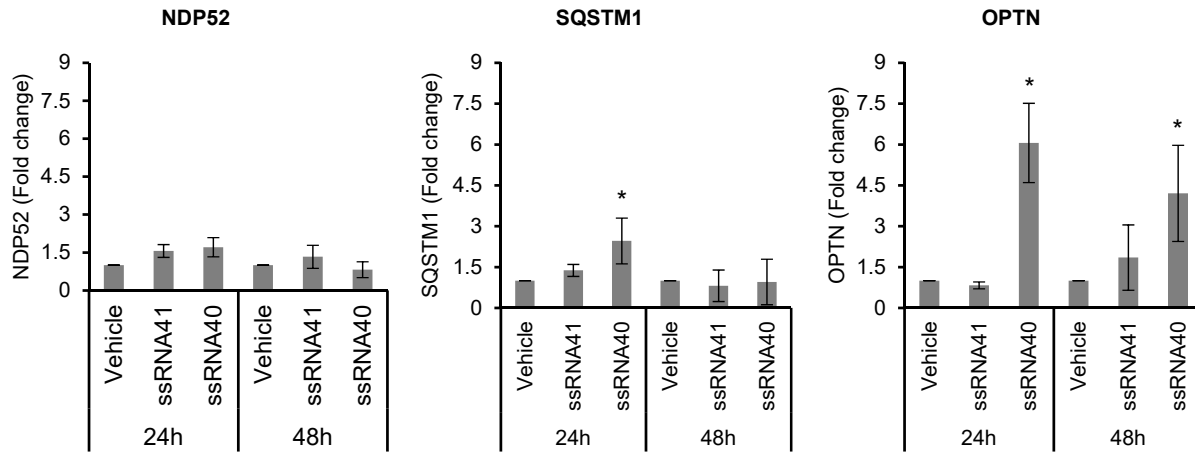

(b)

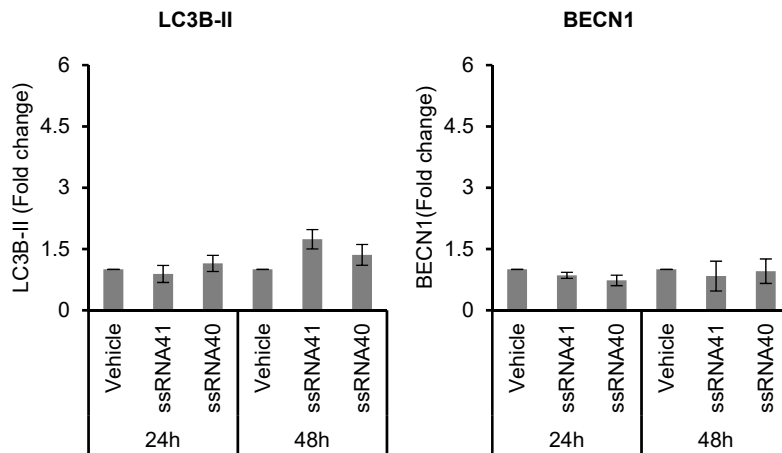

(c)

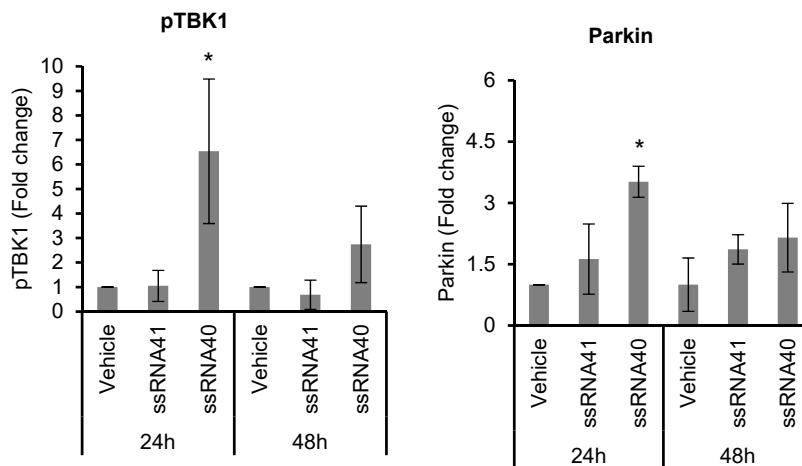

**Figure S2**

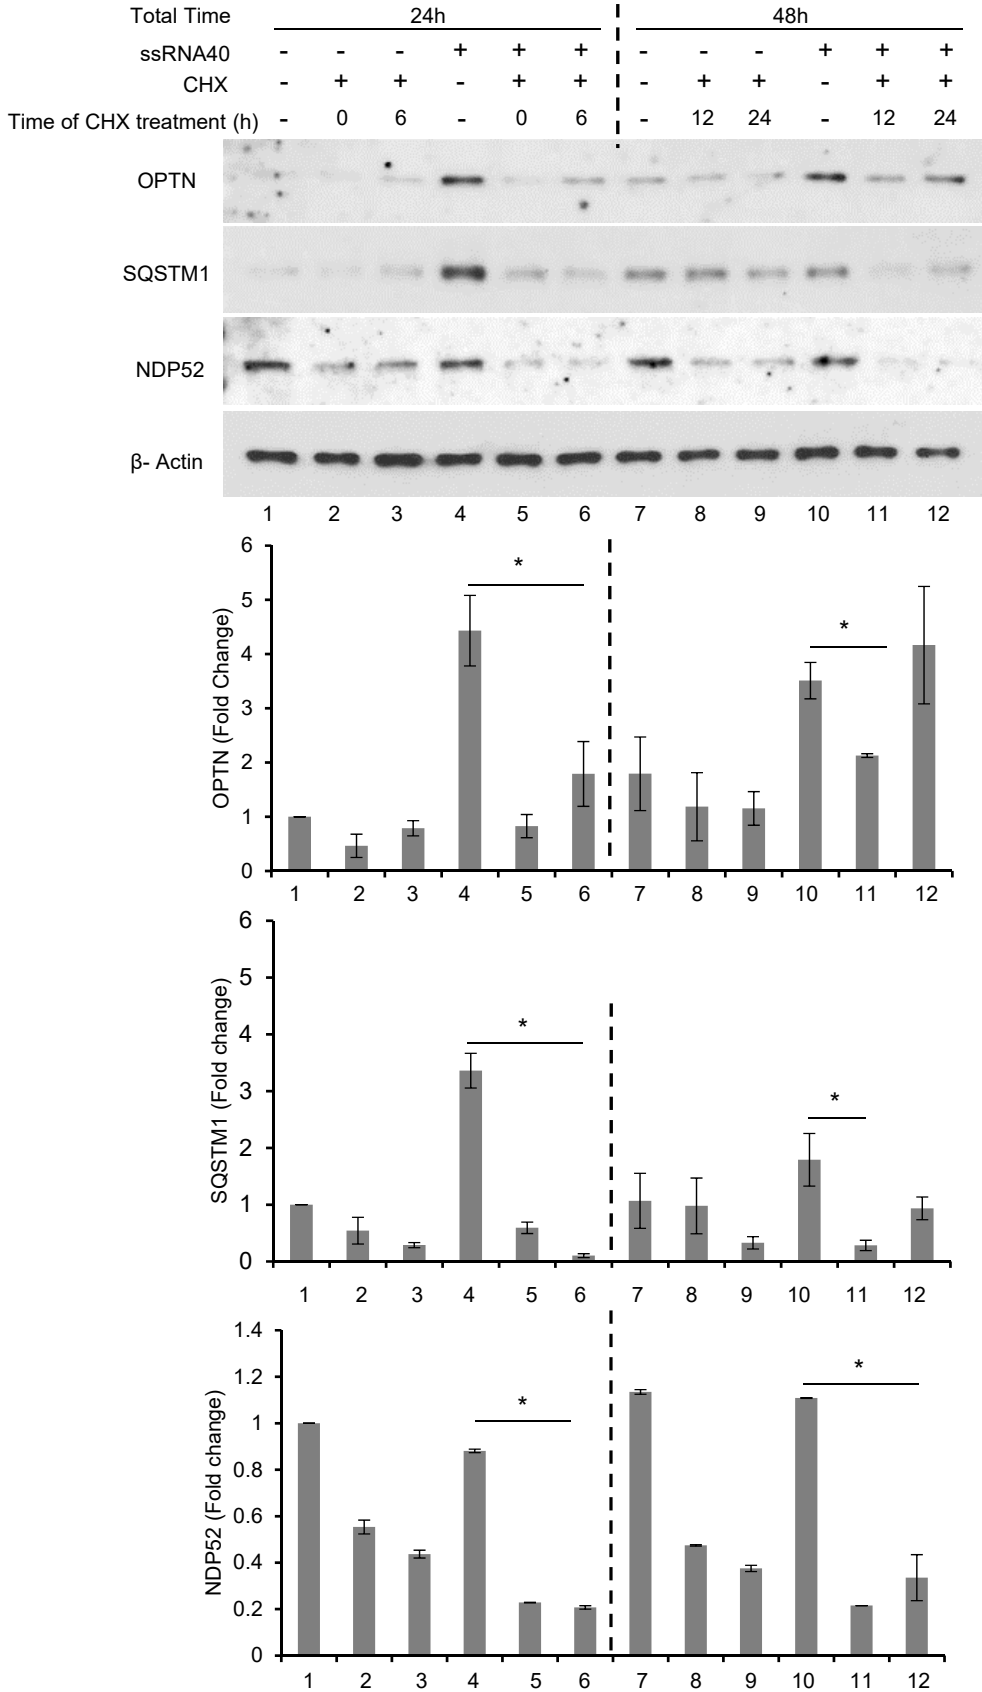

**Figure S3**

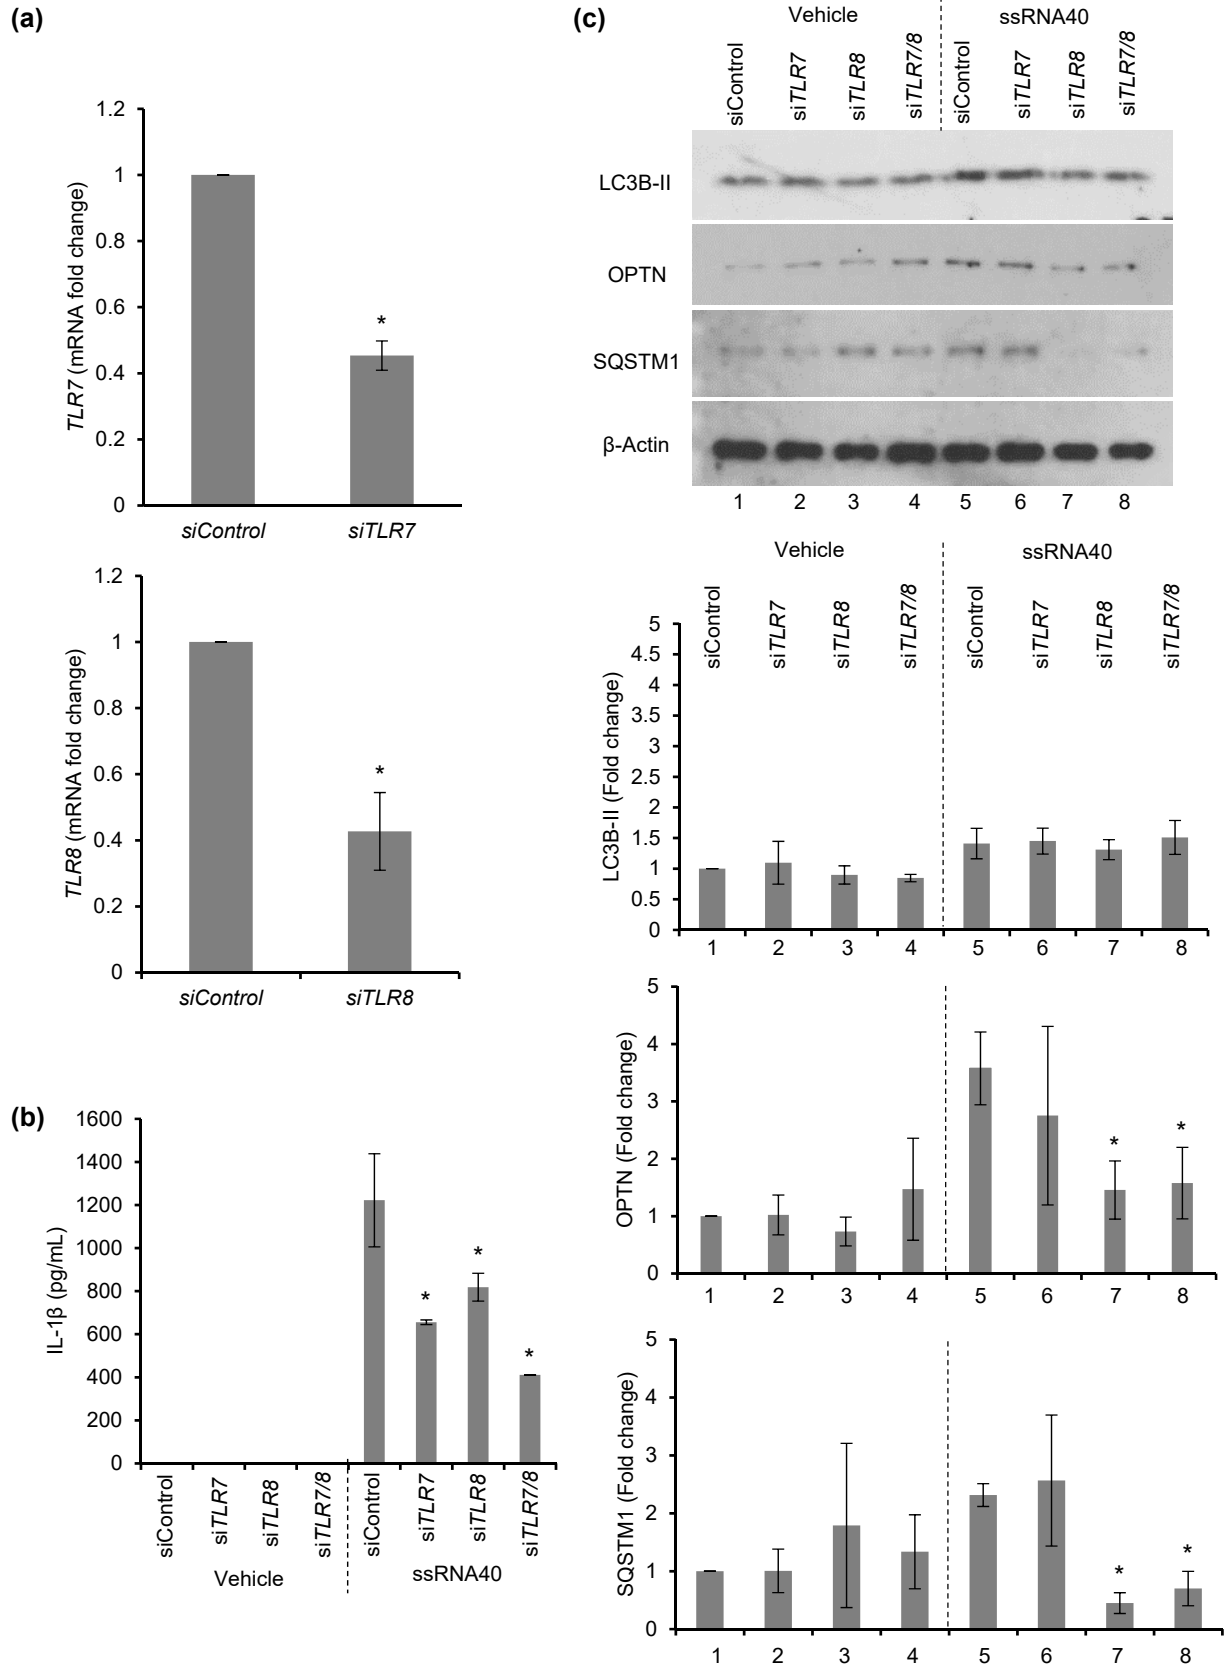

Supplement: NIHMS1022232-supplement-2.pdf [file NIHMS1022232-supplement-2.pdf]
